# Supplementary material for: Assessment of normal myelination in infants and young children using the T1w/T2w mapping technique
Source: Front Neurosci. 2023 Feb 28;17:1102691. doi: 10.3389/fnins.2023.1102691 (PMC10011126; doi:10.3389/fnins.2023.1102691)
Supplement: Supplementary file 2 [file Table_1.XLSX]

## Sheet: Patients_list
N	Age (in months)	Indications for brain MRI
1	0.1	suspected HIE
2	0.3	suspected HIE
3	0.5	suspected brain developmental anomalies
4	0.5	mild ventriculomegaly
5	0.5	suspected brain developmental anomalies
6	0.6	suspected brain developmental anomalies
7	0.6	suspected brain developmental anomalies
8	0.9	mild ventriculomegaly
9	0.9	mild ventriculomegaly
10	1	suspected brain developmental anomalies
11	1.5	suspected brain developmental anomalies
12	1.5	suspected brain developmental anomalies
13	2	infantile hemangioma (extracranial)
14	2	suspected brain developmental anomalies
15	2	mild ventriculomegaly
16	2	suspected brain developmental anomalies
17	2	suspected brain developmental anomalies
18	2	suspected brain developmental anomalies
19	2	small arachnoid cyst in posterior fossa
20	2	suspected brain developmental anomalies
21	2	suspected brain developmental anomalies
22	2	suspected brain developmental anomalies
23	3	suspected TBI
24	3	suspected brain developmental anomalies
25	3	suspected brain developmental anomalies
26	3	suspected brain developmental anomalies
27	4	suspected brain developmental anomalies
28	4	suspected brain developmental anomalies
29	4	suspected brain developmental anomalies
30	4	mild ventriculomegaly
31	5	mild ventriculomegaly
32	5	suspected brain developmental anomalies
33	5	suspected brain developmental anomalies
34	5	suspected brain developmental anomalies
35	6	suspected brain developmental anomalies
36	6	suspected brain developmental anomalies
37	6	suspected brain developmental anomalies
38	6	mild ventriculomegaly
39	6	suspected brain developmental anomalies
40	6	suspected brain developmental anomalies
41	7	small arachnoid cyst in posterior fossa
42	7	suspected brain developmental anomalies
43	7	suspected brain developmental anomalies
44	7	suspected brain developmental anomalies
45	8	small arachnoid cyst in middle fossa
46	8	suspected HIE's sequellae
47	8	suspected brain developmental anomalies
48	8	suspected brain developmental anomalies
49	8	mild ventriculomegaly
50	8	mild ventriculomegaly
51	8	suspected brain developmental anomalies
52	9	suspected brain developmental anomalies
53	9	suspected HIE's sequellae
54	10	suspected brain developmental anomalies
55	10	suspected brain developmental anomalies
56	10	suspected brain developmental anomalies
57	10	suspected HIE's sequellae
58	10	suspected brain developmental anomalies
59	11	suspected brain developmental anomalies
60	11	suspected brain developmental anomalies
61	11	suspected TBI
62	11	suspected brain developmental anomalies
63	12	suspected brain developmental anomalies
64	12	small arachnoid cyst in posterior fossa
65	12	suspected brain developmental anomalies
66	13	suspected brain developmental anomalies
67	13	suspected HIE's sequellae
68	13	suspected brain developmental anomalies
69	13	suspected brain developmental anomalies
70	14	suspected TBI
71	14	suspected brain developmental anomalies
72	14	suspected brain developmental anomalies
73	14	suspected brain developmental anomalies
74	15	suspected brain developmental anomalies
75	15	suspected HIE's sequellae
76	15	suspected brain developmental anomalies
77	16	suspected brain developmental anomalies
78	17	suspected TBI
79	18	suspected brain developmental anomalies
80	18	suspected brain developmental anomalies
81	18	suspected brain developmental anomalies
82	19	suspected brain developmental anomalies
83	19	small arachnoid cyst in posterior fossa
84	20	suspected TBI
85	20	mild ventriculomegaly
86	20	suspected brain developmental anomalies
87	20	suspected brain developmental anomalies
88	21	suspected brain developmental anomalies
89	21	suspected brain developmental anomalies
90	21	small arachnoid cyst in middle fossa
91	21	suspected brain developmental anomalies
92	21	suspected TBI
93	23	suspected brain developmental anomalies
94	23	suspected brain developmental anomalies

## Sheet: legend
HIE	hypoxic-ischemic encephalopathy
TBI	traumatic brain injury
